# Supplementary material
Source: MDPI journal article supplement (https://www.mdpi.com/2071-1050/16/8/3229)
Supplement: s1 [file s1]

Archive with 4 entries (4 files):
- Supplementary material A.pdf
- __MACOSX/._Supplementary material A.pdf
- Supplementary material B .xlsx
- __MACOSX/._Supplementary material B .xlsx
