# Supplementary material
Source: MDPI journal article supplement (https://www.mdpi.com/2071-1050/16/8/3229)
Supplement: s1 [file Supplementary material B .xlsx]

## Sheet: SFM 
				Local Season	North	North	North	North	South	South	South	South	South	West	West	West
Gender	Group	Bahasa Indonesia	English_common	Scientific	Jan	Feb	Mar	Apr	May	Jun	Jul	Aug	Sep	Oct	Nov	Dec	Habitat	Uses
Female	Honey	madu kelulut	Stingless bee honey		1	1	1	1	1	1	1	1	1	1	1	1	Mangrove trunk	Food/sale
Female	Honey	madu lebah	Mangrove honey		1	1	1	1	1	1	1	2	1	1	1	1	Mangrove trunk	Food/sale
Female	Fruit	buah bakau	Mangrove fruit	Lythraceae	3	3	3	3	3	3	3	3	3	3	3	3	Mangrove forest	Sale
Female	Fruit	buah bayam	Mangrove fruit		3	3	3	3	3	3	3	3	3	3	3	3	Mangrove fringes	Food
Female	Fruit	buah jeruju	Holy mangrove fruit	Acanthus ilicifolius	3	3	3	3	3	3	3	3	3	3	3	3	Mangrove treetops	Medicine
Female	Fruit	Buah nipah/tembatuk	Nipa palm fruit		1	1	3	3	1	2	1	1	1	1	1	1	Nipa forest	Food
Female	Fruit	buah nyireh	Nyireh fruit	Xylocarpus rumphii	3	3	3	3	3	3	3	3	3	3	3	3	Nipa forest	Medicine
Female	Fruit	buah perepat/buah berembang	Mangrove apple	Lythraceae	2	2	2	2	2	2	2	2	2	2	2	3	Nipa forest	Food
Female	Fruit	buah tumuk	Oriental mangrove fruit	Bruguiera gymnorhiza	3	3	3	3	3	3	3	3	3	3	3	3	Mangrove forest	Beauty product
Female	Fruit	limau lelang	Mangrove lime		1	1	1	1	1	1	1	1	1	1	1	1	Mangrove forest	Medicine
Female	Plants	buah kukop	Loop-root mangrove	Rhizophora mucronata	3	3	3	3	3	3	3	3	3	3	3	3	Mangrove treetops	Beauty product
Female	Plants	buah kelepeh kambing	Nibung palm	Oncosperma tigillarium	3	3	3	3	3	3	3	3	3	3	3	3	Mangrove trunk	Food
Female	Plants	daun bakau	Mangrove leaves		3	3	3	3	3	3	3	3	3	3	3	3	Mangrove treetops	Tea
Female	Plants	daun bakau muda	young mangrove leaves		3	3	3	3	3	3	3	3	3	3	3	3	Mangrove forest	Tea
Female	Plants	daun jeruju	Holy mangrove leaf	Acanthus ebracteatus	3	3	3	3	3	3	3	3	3	3	3	3	Mangrove treetops	Tea
Female	Plants	daun nipah muda putih	Young white mangrove leaf		3	3	3	3	3	3	3	3	3	3	3	3	Nipa forest	Medicine
Female	Plants	gula nipah	Nipa palm sugar		1	1	1	1	1	1	1	1	1	1	1	1	Nipa forest	Food
Female	Plants	jelatang*	stinging nettles	Laportea aestuans	0	0	0	0	3	3	3	3	0	0	0	0	River/estuary	Food
Female	Plants	mayang nipah	Nipah flower		3	3	1	1	1	1	1	1	1	3	3	3	Nipa forest	Food
Female	Plants	pucuk bakau	Mangrove shoots		3	3	3	3	3	3	3	3	3	3	3	3	Mangrove treetops	Food
Female	Mammals	*	*	*	1	1	1	1	1	1	1	1	1	1	2	2	River/estuary	Food/sale
Female	Mammals	*	*	*	3	3	3	3	3	3	3	3	3	3	3	3	Mangrove forest	Food/Medicine
Female	Mammals	*	*	*	3	3	3	3	3	3	3	3	3	3	3	3	Mangrove forest	Food
Female	Mammals	*	*	*	1	1	1	1	1	1	1	1	1	1	1	1	Mangrove forest	Food/sale
Female	Mammals	*	*	*	1	1	3	3	1	1	1	1	1	1	1	1	Mangrove forest	Food/sale
Female	Mammals	*	*	*	3	3	3	3	3	3	3	3	3	3	3	3	Mangrove forest	Food
Female	Mammals	*	*	*	1	1	1	1	1	1	1	1	1	1	1	1	Mangrove forest	Food/sale
Female	Mammals	*	*	*	1	1	3	3	1	1	1	1	1	1	1	1	Mangrove forest	Food/sale
Female	Mammals	*	*	*	3	3	3	3	3	3	3	3	3	3	3	3	Mangrove forest	Food
Female	Mammals	babi putih	Bearded pig	Sus barbatus	3	3	3	3	3	3	3	3	3	3	3	3	Mangrove forest	Sale
Female	Mammals	*	*	*	3	3	3	3	3	3	3	3	3	3	3	3	Mangrove forest	Sale
Female	Mammals	*	*	*	3	3	3	3	3	3	3	3	3	3	3	3	River/estuary	Food
Female	Mammals	*	*	*	1	1	1	2	2	2	2	2	1	1	1	1	Mangrove forest	Food
Female	Mammals	*	*	*	2	2	2	2	2	2	2	2	2	2	2	2	Mangrove forest	Food/sale
Female	Mammals	*	*	*	3	3	3	3	3	3	3	3	3	3	3	3	Mangrove forest	Food
Female	Mammals	*	*	*	1	1	1	1	1	1	1	1	1	1	1	1	Mangrove forest	Food
Female	Mammals	*	*	*	1	1	1	1	1	1	1	1	1	1	1	1	Mangrove forest	Sale
Female	Mammals	tupai	squirrel	Sciuridae	3	3	3	3	3	3	3	3	3	3	3	3	Mangrove treetops	Food
Female	Insects and worms	Cacing Nipah/Pun-pun	Nipa worm	Miyakea nepa	3	3	3	3	3	3	3	3	3	3	3	3	Nipa forest	Fish bait
Female	Insects and worms	lebah madu	honey bee		1	1	3	3	1	1	1	1	1	1	1	1	Mangrove forest	Food/sale
Female	Reptiles	*	*	*	3	3	3	3	3	3	3	3	3	3	3	3	Mangrove fringes	Food/sale
Female	Reptiles	*	*	*	1	1	1	1	1	1	1	1	1	1	1	3	River/estuary	Food
Female	Reptiles	*	*	*	3	3	3	3	3	3	3	3	3	3	3	3	Mangrove fringes	Beauty product
Female	Reptiles	*	*	*	2	2	2	2	2	2	2	2	2	2	2	2	Mangrove fringes	Food
Female	Reptiles	*	*	*	1	1	1	1	1	1	1	1	1	1	1	3	Mangrove fringes	Food/sale
Female	Reptiles	tekek/tokek	gekko	Gekkonidae	3	3	3	3	3	3	3	3	3	3	3	3	Mangrove forest	Food
Female	Reptiles	Ular sawak	gold ring cat snake	Boiga dendrophila	3	3	3	3	3	3	3	3	3	3	3	3	River/estuary	Sale
Female	Reptiles	Ular tudung itam/tudung arang*	King cobra	Ophiophagus hannah	3	3	3	3	3	3	3	3	3	3	3	3	River/estuary	Sale
Female	Reptiles	ular tudung manau*	Javan spitting cobra	Naja sputatrix	3	3	3	3	3	3	3	3	3	3	3	3	River/estuary	Sale
Female	Birds	ayam hutan	wild chicken	Gallus Gallus	3	3	3	3	3	3	3	3	3	3	3	3	Mangrove fringes	Food
Female	Birds	*	*	*	1	1	1	1	2	2	2	2	1	1	1	1	Mangrove treetops	Food
Female	Birds	*	*	*	3	3	3	3	3	3	3	3	3	3	3	3	Mangrove fringes	Food
Female	Birds	*	*	*	1	1	1	1	1	1	1	1	1	1	1	1	Mangrove treetops	Sale
Female	Birds	*	*	*	3	3	3	3	3	3	3	3	3	3	3	3	Mangrove treetops	Sale
Female	Birds	*	*	*	3	3	3	3	3	3	3	3	3	3	3	3	Mangrove forest	Sale
Female	Birds	*	*	*	1	1	1	1	1	1	1	1	1	1	1	1	Mangrove treetops	Sale
Female	Birds	*	*	*	1	1	1	1	1	1	1	1	1	1	1	1	Mangrove treetops	Sale
Female	Birds	burung gagak	Crow		1	1	1	1	1	1	1	1	1	1	1	1	Mangrove treetops	Food
Female	Birds	*	*	*	1	1	3	3	1	1	1	1	1	1	1	1	Mangrove treetops	Sale
Female	Birds	*	*	*	1	1	1	1	3	3	3	3	1	1	1	1	Mangrove treetops	Food/sale
Female	Birds	*	*	*	3	3	3	3	3	3	3	3	3	3	3	3	Mangrove treetops	Food
Female	Birds	*	*	*	3	3	3	3	3	3	3	3	3	3	3	3	Mangrove treetops	Sale
Female	Birds	*	*	*	2	2	2	2	2	2	2	2	2	2	2	2	Mangrove treetops	Food
Female	Birds	*	*	*	1	1	1	1	1	1	1	1	1	1	1	1	Mangrove treetops	Food
Female	Birds	*	*	*	1	1	1	1	1	1	1	1	1	1	1	1	Mangrove treetops	Food
Female	Birds	*	*	*	3	3	3	3	3	3	3	3	3	3	3	3	Mangrove treetops	Sale
Female	Birds	*	*	*	3	3	3	3	3	3	3	3	3	3	3	3	Mangrove treetops	Food
Female	Birds	*	*	*	1	1	1	1	1	1	1	1	1	1	1	1	Mangrove forest	Sale
Female	Birds	*	*	*	1	1	3	3	1	1	1	1	1	1	1	1	Mangrove treetops	Sale
Female	Birds	Burung merpati	Pigeon		3	3	3	3	3	3	3	3	3	3	3	3	Mangrove forest	Food
Female	Birds	*	*	*	1	1	1	1	1	1	1	1	1	1	1	1	Mangrove treetops	Food
Female	Birds	*	*	*	1	1	1	1	1	1	1	1	1	1	1	1	Mangrove treetops	Sale
Female	Birds	*	*	*	1	1	1	1	1	1	1	1	1	1	1	1	Mangrove treetops	Sale
Female	Birds	*	*	*	3	3	3	3	3	3	3	3	3	3	3	3	Mangrove trunk	Sale
Female	Birds	*	*	*	1	1	3	3	1	1	1	1	1	1	1	1	Mangrove treetops	Food/sale
Female	Birds	*	*	*	3	3	3	3	3	3	3	3	3	3	3	3	Mangrove treetops	Food
Female	Birds	*	*	*	1	1	3	3	1	1	1	1	1	1	1	1	Mangrove treetops	Sale
Female	Birds	burung punai	Pigeon		1	1	3	3	1	1	1	1	1	1	1	1	Mangrove treetops	Food/sale
Female	Birds	burung raja udang	king prawn bird		3	3	3	3	3	3	3	3	3	3	3	3	Mangrove treetops	Sale
Female	Birds	burung ruai	Ruai bird	Argusianus argus	1	1	1	1	1	1	1	1	1	1	1	1	Mangrove fringes	Sale
Female	Birds	burung tekukor	turtle dove		2	2	2	2	2	2	2	2	2	2	2	2	Mangrove treetops	Food
Female	Birds	burung tik taro	tick taro bird		1	1	1	1	1	1	1	1	1	1	1	1	Mangrove treetops	Sale
Female	Birds	burung tiung	common hill myna	Gracula religiosa	1	1	3	3	1	1	1	1	1	1	1	1	Mangrove treetops	Sale
Female	Birds	burung walet	swallow		3	3	3	3	3	3	3	3	3	3	3	3	Mangrove forest	Food
Female	Jellyfish	Ampai Api*	man o' war	Physalia physalis	0	0	0	0	3	3	3	3	3	0	0	0	River/estuary	Food
Female	Jellyfish	Ampai biasa*	Box Jellyfish	Cuboza	0	0	0	0	3	3	3	3	3	0	0	0	River/estuary	Food
Female	Jellyfish	Ampai*/Uber-Uber	Mangrove jellyfish	Cassiopea ornata	3	3	3	3	3	3	3	3	3	3	3	3	River/estuary	Food
Female	Jellyfish	Ubur-ubur*	Jellyfish	Acromitus flagellatus	3	3	3	3	3	3	3	3	3	3	3	3	River/estuary	Food
Female	Crustaceans	Belangkas	Indo-Pacific Horseshoe crab	Tachypleus gigas	1	1	2	3	3	3	2	2	2	1	1	1	Mudflat	Food/sale
Female	Crustaceans	kepiting bakau	Giant mud crab	Scylla serrata	2	2	2	2	2	2	2	3	3	3	3	3	Mangrove bed and roots	Food/sale
Female	Crustaceans	keramak	Red land crab	Gecarcinus quadratus	3	3	3	3	3	3	3	3	3	3	3	3	Mangrove bed	Food/sale
Female	Crustaceans	Keramak hitam	Squareback marsh crab	Armases cinereum	3	3	3	3	3	3	3	3	3	3	3	3	Mangrove bed	Fish bait
Female	Crustaceans	Keramak merah	Violet vinegar crab	Episesarma versicolor	3	3	3	3	3	3	3	3	3	3	3	3	Mangrove bed	Sale
Female	Crustaceans	renjong	Mangrove swimming crab	Thalamita crenata	1	1	1	1	1	1	1	1	1	3	3	3	Mudflat	Food/sale
Female	Crustaceans	udang bangkit	Black tiger shrimp	Penaeus monodon	3	3	3	3	3	3	3	3	3	3	3	3	Mangrove bed	Food/sale
Female	Crustaceans	Udang Galah	giant freshwater shrimp	Macrobrachium rosenbergii	2	2	3	3	2	2	2	2	2	1	1	1	Mangrove roots, Mangrove fringes	Food/sale
Female	Crustaceans	udang gantung/river	Glass shrimp	Macrobrachium lanchesteri	2	2	2	2	3	3	3	3	3	2	2	2	Mangrove forest	Food/Fish bait
Female	Crustaceans	Udang Getah	Flathead lobster	Thenus orientalis	1	1	1	1	1	1	1	1	1	1	1	1	River/estuary	Food/sale
Female	Crustaceans	Udang Kuning	Whiteleg shrimp	Litopenaeus vannamei	3	3	3	3	3	3	3	3	2	1	1	1	Mangrove roots	Food/sale
Female	Crustaceans	Udang selatan/Wangkang		Penaeus merguiensis	2	2	2	2	2	2	2	2	2	2	2	2	Mangrove fringes, Mangrove roots and River/estuary	Food/sale
Female	Crustaceans	udang sungkur	mud lobster	Thalassina anomala	2	2	2	2	3	3	3	3	3	3	2	2	Mangrove bed	Food/sale
Female	Molluscs	*	*	*	1	1	1	1	3	3	3	3	1	1	1	1	River/estuary	Food
Female	Molluscs	kepah	clam	Polymesoda erosa	2	2	3	3	3	3	3	3	3	2	2	2	Mangrove roots, mangrove bed and mudflat	Sale
Female	Molluscs	Kerang	Blood clam	Anadara granosa	0	1	2	3	3	3	2	0	0	0	0	0	Mudflat	Sale
Female	Molluscs	Kijing	Tropical swan mussle	Pilsbryoconcha exilis	1	1	2	2	3	3	2	2	2	2	1	1	Mudflat	Food/sale
Female	Molluscs	Kupang	Green mussels	Perna viridis	0	1	2	3	3	3	2	0	0	0	0	0	Mudflat	Food/sale
Female	Molluscs	Siput babi	Giant African snail	Lissachatina fulica	3	3	3	3	3	3	3	3	3	3	3	3	Nipa/Mangrove forest	Fish bait
Female	Molluscs	Siput Batu	Rock snail	Codringtonia codringtonii	3	3	3	3	3	3	3	3	3	3	3	3	Mangrove bed	Food
Female	Molluscs	Siput Bulan	Moon snail	Naticidae	3	3	3	3	3	3	3	3	3	3	3	3	Mangrove trunk	Food/sale
Female	Molluscs	Siput Liak	Sea snail	Nerita chamaeleon	3	3	3	3	3	3	3	3	3	3	3	3	Mangrove trunk	Food/sale
Female	Molluscs	siput panjang	Razor Shell	Ensis arcuatus	3	3	3	3	3	3	3	3	3	3	3	3	Nipa/Mangrove forest	Food/sale
Female	Molluscs	siput pendek	canal monodont	Monodonta canalifera	3	3	3	3	3	3	3	3	3	3	3	3	Nipa/Mangrove forest	Food/sale
Female	Molluscs	Siput Tumit/Tai Ayam	Long snail	Viviparus	3	3	3	3	3	3	3	3	3	3	3	3	Mangrove forest and Nipa forest	Food/sale
Female	Molluscs	Tiram	Mangrove oyster/Pacific oyster	Crassostrea gigas	0	1	2	3	3	3	2	0	0	0	0	0	Nipa forest	Food/sale
Female	Molluscs	Unam	Large sea snail/spiral melongena	Volegalea cochlidium	1	1	2	2	3	3	2	2	2	2	1	1	Mudflat, Mangrove trunk, Mangrove bed and River/estuary	Food/sale
Female	Sharks & Rays	*	*	*	2	2	2	2	2	2	2	2	2	2	2	2	Mangrove fringes and River/estuary	Food/sale
Female	Sharks & Rays	*	*	*	1	1	1	1	1	1	1	1	1	1	1	1	River/estuary and Mangrove fringes	Food/sale
Female	Sharks & Rays	*	*	*	2	2	2	2	2	2	2	2	2	2	2	2	River/estuary	Food/sale
Female	Sharks & Rays	*	*	*	2	2	2	2	2	2	2	2	2	2	2	2	River/estuary	Food/sale
Female	Sharks & Rays	*	*	*	3	3	3	3	3	3	3	3	3	3	3	3	River/estuary and Mangrove fringes	Food/sale
Female	Sharks & Rays	*	*	*	2	2	2	2	2	2	2	2	2	2	2	2	River/estuary	Food/sale
Female	Sharks & Rays	*	*	*	1	1	1	1	1	1	1	1	1	1	1	1	River/estuary	Food/sale
Female	Sharks & Rays	*	*	*	1	1	1	1	1	1	1	1	1	1	1	1	River/estuary	Food/sale
Female	Sharks & Rays	*	*	*	1	1	1	1	1	1	1	1	1	1	1	1	River/estuary	Food/sale
Female	Finfish	Belut/Sirat-sirat	Snake eel	Ophichthus altipennis	3	3	3	3	3	3	3	3	3	3	3	3	Mangrove fringes and Ponds	Food
Female	Finfish	Ikan Alu-alu	Barracuda	Sphyraena	3	3	3	3	3	3	3	3	3	3	3	3	River/estuary	Food/sale
Female	Finfish	ikan ansam	Blackfin snapper	lutjanus buccanella	1	1	1	1	1	1	1	1	1	1	1	1	River/estuary	Food
Female	Finfish	ikan baji-baji	Bartail flathead	Platycephalus indicus	3	3	3	3	3	3	3	3	3	3	3	3	River/estuary and Mangrove fringes	Food/sale
Female	Finfish	ikan bandeng	Milkfish	Chanos chanos	1	1	1	1	1	1	1	1	1	1	1	1	Mangrove fringes	Food/sale
Female	Finfish	ikan baung	Catfish	Hemibagrus nemurus	3	2	2	1	1	1	1	1	1	3	3	3	River/estuary and Mangrove fringes	Food/sale
Female	Finfish	ikan bawal	Silver pomfret	Pampus argenteus	1	1	1	1	1	1	1	1	1	1	1	1	River/estuary	Food/sale
Female	Finfish	ikan bebekot/bodoh-bodoh	The climbing perch	Anabas testudineus	3	3	3	3	3	3	3	3	3	3	3	3	Mangrove fringes	Food/sale
Female	Finfish	Ikan Belanak	Bluespot mullet	Crenimugil seheli	2	2	3	3	3	3	3	3	3	1	1	1	River/estuary, Mangrove fringes and Mudflat	Food/sale
Female	Finfish	ikan belanak kedere	Flathead grey mullet	Mugil cephalus	2	2	2	2	3	3	3	3	3	1	1	1	River/estuary	Food/sale
Female	Finfish	*	*	*	1	1	2	2	2	2	2	2	1	1	1	1	River/estuary	Food/sale
Female	Finfish	ikan beluak mate	herring or slender shad	Ilisha elongata	3	3	3	3	3	3	3	3	3	3	3	3	River/estuary	Food/sale
Female	Finfish	Ikan Belukang	marine/sea catfish	Hexanematichthys sagor	3	3	3	3	3	3	3	3	3	3	3	3	River/estuary, Mangrove fringes and Mudflat	Food/sale
Female	Finfish	Ikan Betutu	Marble goby	Oxyeleotris marmorata	2	2	2	2	3	3	3	3	3	1	1	1	River/estuary, Mangrove fringes and Mudflat	Food/sale
Female	Finfish	ikan biawan	Kissing gouramis	Helostoma temminckii	1	1	1	1	1	1	1	1	1	1	1	1	Mangrove fringes	Food/sale
Female	Finfish	ikan bulan(silok)	Indo-Pacific tarpon	Megalops cyprinoides	1	1	1	1	3	3	3	3	1	1	1	1	Mangrove fringes	Food/sale
Female	Finfish	Ikan Bulu ayam	Gangetic anchovy	Thryssa mystax	3	3	3	3	3	3	3	3	3	3	3	3	Mangrove fringes and Mudflat	Food/sale
Female	Finfish	ikan buntal hitam/burik*	Whitespotted pufferfish	Arothron hispidus	3	3	3	3	3	3	3	3	3	3	3	3	River/estuary	Food (needs knowledge on preperation)
Female	Finfish	Ikan buntal kuning *	Golden pufferfish	Arothron meleagris	3	3	3	3	3	3	3	3	3	3	3	3	Mangrove forest and River/estuary	Food (needs knowledge on preperation)
Female	Finfish	Ikan buntal tutol/tentara laut*	narrow lined pufferfish	Arothron manilensis	3	3	3	3	3	3	3	3	3	3	3	3	River/estuary	Food (needs knowledge on preperation)
Female	Finfish	ikan daun baru	Spotted sicklefish	Drepane punctata	1	1	1	1	3	3	3	3	1	1	1	1	River/estuary	Food/sale
Female	Finfish	Ikan Gabus	Snakehead murrel	Channa striata	3	3	3	3	3	3	3	3	3	3	3	3	Mangrove fringes and Mudflat	Food/sale
Female	Finfish	Ikan Gegerud	saddle grunt	Pomadasys maculatus	1	1	1	1	1	1	1	1	1	1	1	1	Mangrove fringes	Food/sale
Female	Finfish	ikan gelame	Silver white croaker	Pennahia argentata	3	3	3	3	3	3	3	3	3	3	3	3	River/estuary, Mangrove fringes and Mudflat	Food/sale
Female	Finfish	ikan gembong	Chub mackerels	Rastrelliger	0	0	0	0	0	0	0	0	0	3	3	3	River/estuary	Food/sale
Female	Finfish	ikan jahan	Giant catfish	Netuma thalassina	3	3	3	3	3	3	3	3	3	3	3	3	Mangrove fringes	Food/sale
Female	Finfish	ikan jelawat	Hoven's carp	Leptobarbus hoevenii	1	1	1	1	1	1	1	1	1	1	1	1	Mangrove fringes	Food/sale
Female	Finfish	ikan juare		Pangasius polyuranodon	3	3	3	3	3	3	3	3	3	3	3	3	Mangrove fringes	Food/sale
Female	Finfish	ikan jumpol	Common halfbeak	Hyporhamphus unifasciatus	2	2	2	2	3	3	3	3	3	2	2	2	Mangrove fringes	Food/sale
Female	Finfish	ikan kakap hitam batu	Mangrove red snapper	Lutjanus argentimaculatus	3	3	3	3	3	3	3	3	3	3	3	3	Mangrove fringes	Food/sale
Female	Finfish	Ikan Kakap putih	Black and white snapper	Macolor niger	3	3	3	3	3	3	3	3	3	3	3	3	River/estuary and ponds	Food/sale
Female	Finfish	Ikan Kelampai/Ikan Tirus	Jewfish	Argyrosomus japonicus	3	3	3	3	3	3	3	3	3	3	3	3	Mangrove fringes and Mudflat	Food/sale
Female	Finfish	ikan kelempes	Barred queenfish	Chorinemus tala	1	1	1	1	1	1	1	1	1	3	3	3	River/estuary	Food/sale
Female	Finfish	ikan kepar-kepar	climbing perch	Anabas testudineus	3	3	3	3	3	3	3	3	3	3	3	3	Mangrove fringes	Food/sale
Female	Finfish	Ikan Kepetek	ponyfish	Leiognathidae	3	3	3	3	3	3	3	3	3	3	3	3	Mangrove fringes and Mudflat	Food/sale
Female	Finfish	ikan kerandang	Emperor Snakehead	Channa Marulioides	3	3	3	3	3	3	3	3	3	3	3	3	Mangrove fringes	Food/sale
Female	Finfish	Ikan kerapu	Potato grouper	Epinephelus tukula	1	1	1	1	1	1	1	1	1	1	1	1	River/estuary	Food/sale
Female	Finfish	Ikan Kurau	Indian threadfin	Eleutheronema tetradactylum	1	1	1	1	1	1	1	1	1	1	1	1	River/estuary, Mangrove fringes and Mudflat	Food/sale
Female	Finfish	ikan lais	glass catfish	Kryptopterus bicirrhis	2	2	2	2	2	2	2	3	3	3	2	2	Mangrove fringes	Food/sale
Female	Finfish	Ikan lepuk hitam*	clearfin lionfish	Pterois radiata	1	1	1	1	1	1	1	1	1	1	1	1	Mangrove fringes and Mudflat	Food (needs knowledge on preperation)
Female	Finfish	Ikan Lundu	two spot catfish	Mystus nigriceps	3	2	2	3	3	3	2	2	2	3	3	3	River/estuary and Mangrove fringes	Food/sale
Female	Finfish	Ikan Malong	Daggertooth pike conger	Muraenesox cinereus	3	3	3	3	3	3	3	3	3	3	3	3	Mangrove fringes and Mudflat	Food/sale
Female	Finfish	ikan malong kuning	Yellow pike conger	Congresox talabon	1	1	1	1	1	1	1	1	1	1	1	1	River/estuary	Food, Sale and Fish Bait
Female	Finfish	ikan pasir-pasir	Flathead Sandfish	Lesueurina platycephala	3	3	3	3	3	3	3	3	3	3	3	3	River/estuary and Mangrove fringes	Food/sale
Female	Finfish	Ikan patin	Iridescent shark/catfish	Pangasianodon hypophthalmus	2	2	2	2	1	1	1	1	1	3	3	3	Mangrove fringes	Food/sale
Female	Finfish	Ikan peras	Beardless barb	Anematichthys apogon	1	1	1	1	1	1	1	1	1	1	1	1	River/estuary	Food/sale
Female	Finfish	ikan pirang-pirang	Scaly hairfin anchovy	Setipinna taty	3	3	3	3	3	3	3	3	3	3	3	3	River/estuary	Food
Female	Finfish	ikan ruan tasek/gabus	Cobia	Rachycentron canadum	1	1	1	1	1	1	1	1	1	1	1	1	River/estuary, Mangrove fringes and Mudflat	Food/sale
Female	Finfish	ikan runjing	large yellow crocea	Larimichthys crocea	3	3	3	3	3	3	3	3	3	3	3	3	River/estuary	Food
Female	Finfish	ikan sapi-sapi	Zig-zag eel	Mastacembelus armatus	3	1	1	1	1	1	1	1	1	3	3	3	River/estuary and Mangrove fringes	Food/sale
Female	Finfish	ikan sebelah	Largetooth flounder	Pseudorhombus arsius	1	1	1	1	1	1	1	1	1	1	1	1	River/estuary	Food/sale
Female	Finfish	ikan selangat	Chacunda gizzard shad	Anodontostoma chacunda	3	3	3	2	2	2	2	2	2	2	2	3	River/estuary	Food/sale
Female	Finfish	ikan selayur	haritail fish	Trichiurus lepturus	1	1	1	1	1	1	1	1	1	1	1	1	Mangrove fringes	Food/sale
Female	Finfish	Ikan Sembelang	eeltail catfish	Plotosidae	3	3	3	3	3	3	2	2	2	3	3	3	River/estuary	Food/sale
Female	Finfish	ikan semerah/Ikan kakap nipah	Red snapper	Lutjanus bitaeniatus	3	3	3	3	3	3	3	3	3	3	3	3	River/estuary	Food/sale
Female	Finfish	Ikan senangin	Fourfinger threadfin	Eleutheronema tetradactylum	1	1	1	1	1	1	1	1	1	1	1	1	River/estuary	Food/sale
Female	Finfish	ikan senjulung	Black-barred halfbeak	Hemiramphus far	3	3	3	3	3	3	3	3	3	3	3	3	River/estuary and Mangrove fringes	Food/sale
Female	Finfish	Ikan senyumpit	Smallscale Archerfish	Toxotes microlepis	1	1	2	3	3	3	3	3	3	1	1	1	Mangrove fringes	Food/sale
Female	Finfish	Ikan sepat	three spot gourami	richopodus trichopterus	3	3	3	3	3	3	3	3	3	3	3	3	River/estuary	Food/sale
Female	Finfish	Ikan Seriding	scalloped glassfish	Ambassis nalua	3	3	3	3	3	3	3	3	3	3	3	3	Mangrove fringes	Food/sale
Female	Finfish	*	*	*	1	1	1	1	1	1	1	1	1	1	1	1	River/estuary	Food/sale
Female	Finfish	ikan sunuk	Leopard coral grouper	Plectropomus leopardus	1	1	1	1	1	1	1	1	1	1	1	1	River/estuary and Mangrove fringes	Food/sale
Female	Finfish	Ikan Talang	Doublespotted queenfish	Scomberoides lysan	3	3	3	3	3	3	3	3	3	3	3	3	Mangrove fringes	Food/sale
Female	Finfish	ikan tapah	Freshwater catfish	Wallago attu	1	1	1	1	1	1	1	1	1	1	1	1	River/estuary and Mudflat	Medicine
Female	Finfish	ikan tembakol	Mudskippers	Oxudercinae	3	3	3	3	3	3	3	3	3	3	3	3	River/estuary	Food/sale
Female	Finfish	Ikan Tenggiri/ikan tetambi	Spanish mackerel	Scomberomorus commerson	3	2	2	2	2	2	2	2	2	3	3	3	River/estuary	Food/sale
Female	Finfish	Ikan Tiang layar	Indo-Pacific Sailfish	Istiophorus platypterus	2	2	2	2	2	2	2	2	2	2	2	2	Mangrove fringes and Mudflat	Food/sale
Female	Finfish	Ikan Tilan	Fire eel	Mastacembelus erythrotaenia	1	1	1	1	1	1	1	1	1	1	1	1	River/estuary, Mangrove fringes and Mudflat	Food/sale
Female	Finfish	Ikan Timah-timah	Largehead hairtail	Trichiurus lepturus	1	1	1	1	1	1	1	1	1	1	1	1	River/estuary	Food/sale
Female	Finfish	Ikan Todak	Swordfish	Xiphias gladius	3	3	3	3	3	3	3	3	3	3	3	3	River/estuary	Food/sale
Female	Finfish	Ikan toman	Giant snakehead	Channa micropeltes	2	2	2	2	3	3	3	3	1	1	1	1	River/estuary	Food/sale
Female	Finfish	ikan tudung tempayan	Teira batfish	Platax teira	1	1	1	1	2	2	2	2	1	1	1	1	Mangrove fringes	Food/sale
Female	Finfish	ikan tukah-tukah/pari kecil#	Mangrove whipray	Himantura granulata	1	1	1	1	1	1	1	1	1	1	1	1	Mangrove fringes	Food/sale
Female	Finfish	ikan tumbok baneh	Shortbill spearfish	Tetrapturus angustirostris	1	1	1	1	1	1	1	1	1	1	1	1	River/estuary	Food/sale
Female	Finfish	ikang keretang	Giant grouper	Epinephelus lanceolatus	1	1	1	1	1	1	1	1	1	1	1	1	River/estuary	Food/sale
Female	Finfish	ikang kerong-kerong	Crescent grunter	Terapon jarbua	1	1	1	1	1	1	1	1	1	1	1	1	River/estuary, Mangrove fringes and Mudflat	Food/sale
Female	Finfish	Ikang Ketang/Gibam	spotted butterfish or tiger scat	Scatophagus argus	1	1	2	3	3	3	3	2	2	1	1	1	River/estuary	Food/sale
Female	Finfish	ikang seluang	Seluang fish	Rasbora	3	3	3	3	3	3	3	3	3	3	3	3	River/estuary and Mangrove fringes	Food (needs knowledge on preperation)
Female	Finfish	Lepuk biasa*	Red Lionfish	Pterois volitans	2	2	2	2	2	2	2	2	2	2	2	2	River/estuary	Food/sale
Female	Finfish	*	*	*	1	1	1	1	1	1	1	1	1	1	1	1	River/estuary	Food/sale
Male	Honey	Madu Kelulut	Stingless bee honey		1	1	1	1	1	1	1	1	1	1	1	1	Mangrove trunk	Food/sale
Male	Honey	Madu Lebah	Mangrove honey		1	2	2	2	3	3	1	1	1	1	1	1	Mangrove trunk	Food/sale
Male	Fruit	buah bayam	Mangrove fruit		1	1	1	1	1	1	1	1	1	1	1	1	Nipa forest	Food
Male	Fruit	Buah Berembang	Mangrove apple	Lythraceae	3	3	3	3	3	3	3	3	3	3	3	3	Mangrove treetops	Food/Medicine
Male	Fruit	Limau Lilang	Mangrove lime		3	1	1	1	1	1	1	1	3	3	3	3	Mangrove treetops	Food
Male	Fruit	Buah Nipah	Nipa fruit		2	1	1	1	1	1	1	1	2	3	3	3	Nipa forest	Food
Male	Fruit	Buah Nyireh	Nyireh fruit	Xylocarpus rumphii	3	3	3	3	3	3	3	3	3	3	3	3	Mangrove trunk	Medicine
Male	Plants	Buah Kelepeh Kambing	Nibung palm	Oncosperma tigillarium	2	2	2	2	2	2	2	2	2	2	2	2	Mangrove treetops	Food
Male	Plants	daun belukup/bakau	Mangrove leaves		3	3	3	3	3	3	3	3	3	3	3	3	Mangrove treetops	Food and Tea
Male	Plants	Jelatang*	stinging nettles	Laportea aestuans	0	3	3	3	3	3	3	3	0	0	0	0	River/estuary	Food
Male	Plants	Mayang Nipah	Nipah flower		2	1	1	1	1	1	1	1	3	3	3	3	Nipa forest	Food
Male	Plants	Pucok Bakau	Mangrove shoots		3	3	3	3	3	3	3	3	3	3	3	3	Mangrove trunk, Mangrove bed and Mangrove forest	Food
Male	Mammals	*	*	*	1	1	1	1	1	1	1	1	1	1	1	1	Mangrove fringes	Food/sale
Male	Insects and worms	lintah nipah	Nipa worm		3	3	3	3	3	3	3	3	3	3	3	3	Nipa forest	Fish bait
Male	Reptiles	*	*	*	3	3	3	3	3	3	3	3	3	3	3	3	Mangrove fringes	Food
Male	Reptiles	*	*	*	3	3	3	3	3	3	3	3	3	3	3	3	River/estuary	Food
Male	Jellyfish	Ampai	Man o' war	Physalia physalis	3	3	3	3	3	3	3	3	3	3	3	3	River/estuary	Food
Male	Jellyfish	Ampai/ubur-ubur*	Jellyfish	Acromitus flagellatus	2	2	3	3	3	3	3	3	3	2	2	2	River/estuary	Food
Male	Crustaceans	Belangkas*	Indo-Pacific Horseshoe crab	Tachypleus gigas	3	1	1	1	1	1	1	1	1	1	1	1	River/estuary and Mangrove fringes	Food/sale
Male	Crustaceans	Kepiting Bakau	Giant mud crab	Scylla serrata	3	2	2	2	2	2	2	2	2	2	3	3	Mangrove bed, Roots and Mudflat	Food/sale
Male	Crustaceans	Kepiting Koncok (Kecil)	Compressed fiddler crab	Tubuca coarctata	1	1	1	1	1	1	1	1	1	1	1	1	Mangrove fringes	Sale
Male	Crustaceans	Kepiting Pipit/Merah	Mangrove fiddler crab	Tubuca rhizophorae	3	2	2	2	2	2	2	2	2	3	3	3	Mangrove bed	Food/sale
Male	Crustaceans	Keramak	Red land crab	Gecarcinus quadratus	3	3	3	3	3	3	3	3	3	3	3	3	Mangrove fringes, Mangrove treetops and Mangrove bed	Food
Male	Crustaceans	Udang Bangkit	Black tiger shrimp	Penaeus monodon	2	2	2	2	2	2	2	2	2	2	2	2	Mangrove fringes and Mangrove forest	Food/Sale and Fish Bait
Male	Crustaceans	Udang Galah	giant freshwater shrimp	Macrobrachium rosenbergii	2	2	2	2	2	2	2	2	2	2	2	2	Mangrove roots and Mangrove fringes	Food/sale
Male	Crustaceans	Udang Getak/Getah	Flathead lobster	Thenus orientalis	1	1	1	2	2	2	2	1	1	1	1	1	Mangrove bed, Mangrove fringes and River	Food/sale
Male	Crustaceans	Udang Kare	mud lobster	Thalassina anomala	1	1	1	1	1	1	1	1	1	1	1	1	Mudflat, Mangrove bed and River/estuary	Food/Sale and Medication
Male	Crustaceans	Udang Kuning	Whiteleg shrimp	Litopenaeus vannamei	2	2	2	3	3	3	3	3	2	2	2	1	Mangrove roots and Mangrove bed	Food/sale
Male	Crustaceans	Udang Selatan	Glass shrimp	Macrobrachium lanchesteri	2	2	2	2	2	2	2	2	2	2	2	2	Mangrove fringes, mangrove roots, Forest and River/estuary	Food/sale
Male	Crustaceans	Udang Sungkur	Rebon	Acetes	2	2	2	2	2	2	2	2	2	2	1	1	Mangrove fringes, Mangrove bed and River/estuary	Food/sale
Male	Crustaceans	Udang Teh/Pecie/Wangkang	White Banana Prawn	Penaeus merguiensis	2	2	2	2	3	3	3	3	2	1	1	1	River/estuary and Mangrove fringes	Food/sale
Male	Crustaceans	Renjong	Mangrove swimming crab	Thalamita crenata	1	1	2	2	2	3	3	3	2	2	1	1	River/estuary	Sale
Male	Molluscs	Cumi-cumi	Common squid	Loliginidae	1	1	1	2	2	3	3	3	2	2	1	1	River/estuary	Sale
Male	Molluscs	Kepah	Clam	Polymesoda erosa	2	2	3	3	3	3	3	3	2	2	1	1	Mangrove bed	Food/sale
Male	Molluscs	Kerang	Blood clam	Anadara granosa	0	0	3	3	3	3	2	2	0	0	0	0	Mangrove fringes	Sale
Male	Molluscs	Kijing	Tropical swan mussle	Pilsbryoconcha exilis	1	1	2	2	2	3	3	3	2	2	1	1	Mangrove bed	Food/sale
Male	Molluscs	Kupang	Green mussels	Perna viridis	0	0	0	1	1	3	3	3	0	0	0	0	Mangrove fringes	Food/sale
Male	Molluscs	siput babi	Giant African snail	Lissachatina fulica	3	2	2	2	2	2	2	2	2	3	3	3	Mangrove treetops	Fish bait
Male	Molluscs	Siput Batu	Rock snail	Codringtonia codringtonii	1	1	1	1	1	1	1	1	1	1	1	1	Mangrove trunk	Food
Male	Molluscs	Siput kondang	Golden apple snails	Pomacea incerlarum	3	2	2	2	2	2	2	2	2	3	3	3	Mangrove fringes	Food/sale
Male	Molluscs	siput panjang/tengkuyung	Razor Shell	Ensis arcuatus	3	3	2	2	2	2	2	2	2	3	3	3	Mangrove trunk, Nipa tree and Mangrove fringes	Food/sale
Male	Molluscs	siput pendek	canal monodont	Monodonta canalifera	3	3	2	2	2	2	2	2	2	3	3	3	Mangrove trunk	Food/sale
Male	Molluscs	siput tai ayam	Long snail	Viviparus	3	2	2	2	2	2	2	2	2	3	3	3	Mangrove bed	Food/sale
Male	Molluscs	Siput Timbak/pendek	Sea snail	Nerita histrio	3	2	2	2	2	2	2	2	2	3	3	3	Mangrove trunk	Food/sale
Male	Molluscs	Sotong / Ba'tau	Cuttlefish	Sepiida	1	1	1	2	2	3	3	3	2	2	1	1	River/estuary	Sale
Male	Molluscs	Tiram	Mangrove oyster/Pacific oyster	Crassostrea gigas	2	2	2	2	2	3	3	3	2	2	2	2	Nipa forest and River/estuary	Food/sale
Male	Molluscs	Unam	Large sea snail/spiral melongena	Volegalea cochlidium	2	3	3	3	3	3	3	3	3	3	2	2	Mangrove trunk and Mangrove bed	Food/Sale and Medication
Male	Sharks & Rays	Ikan Hiu	Hardnose shark	Carcharhinus macloti	1	1	1	1	1	1	1	1	1	1	1	1	River/estuary	Food/sale
Male	Sharks & Rays	Ikan Pari	Common stingray	Dasyatis pastinaca	1	1	1	1	1	1	1	1	1	1	1	1	River/estuary	Food/sale
Male	Finfish	Belut	Snake eel	Ophichthus altipennis	2	2	2	2	2	2	2	2	2	2	2	2	Mangrove fringes, River/estuary and Mangrove bed	Food and Fish bait
Male	Finfish	Ikan Alu-alu	Barracuda	Sphyraena	1	1	1	1	1	1	1	1	1	1	1	1	River/estuary, Mangrove fringes and Mudflat	Food/sale
Male	Finfish	Ikan Baji-baji	Bartail flathead	Platycephalus indicus	1	1	1	1	1	1	1	1	1	1	1	1	River/estuary and Mangrove fringes	Food/sale
Male	Finfish	ikan bandeng	Milkfish	Chanos chanos	1	1	1	1	1	1	1	1	1	1	1	1	River/estuary	Food/sale
Male	Finfish	ikan baung	Catfish	Hemibagrus nemurus	3	3	3	3	3	3	3	3	3	3	3	3	River/estuary and Mangrove fringes	Food/sale
Male	Finfish	ikan bawal (putih polos)	Silver pomfret	Pampus argenteus	1	2	2	2	3	3	3	3	1	1	1	1	Mangrove fringes	Food/sale
Male	Finfish	ikan bawal dogang (hitam)	Black pomfret	Parastromateus niger	1	2	2	2	3	3	3	3	1	1	1	1	Mangrove fringes	Food/sale
Male	Finfish	Ikan Bayor/Ikan Timah-Timah	Largehead hairtail	Trichiurus lepturus	2	2	2	2	2	2	2	2	2	2	2	2	River/estuary and Mangrove fringes	Food/sale
Male	Finfish	Ikan Bekot	The climbing perch	Anabas testudineus	2	2	2	2	2	2	2	2	2	2	2	2	River/estuary and Mangrove fringes	Food/sale
Male	Finfish	Ikan Belanak	Bluespot mullet	Crenimugil seheli	2	3	3	3	3	3	3	3	2	1	1	1	Mangrove fringes	Food/sale
Male	Finfish	Ikan Beleak Mate	herring or slender shad	Ilisha elongata	3	3	3	3	3	3	3	3	3	3	3	3	River/estuary and Mangrove fringes	Food/sale
Male	Finfish	ikan belukang/Duri	marine/sea catfish	Hexanematichthys sagor	3	3	3	3	3	3	3	3	3	3	3	3	River/estuary, Mangrove fringes and Mudflat	Food/Sale and Fish bait
Male	Finfish	ikan belungur/pasir-pasir	Flathead Sandfish	Lesueurina platycephala	2	2	2	2	2	2	2	2	2	2	2	2	River/estuary and Mangrove fringes	Food/sale
Male	Finfish	ikan betutu	Marble goby	Oxyeleotris marmorata	1	1	1	1	1	1	1	1	1	1	1	1	River/estuary, Mangrove fringes and Forest	Food/sale
Male	Finfish	Ikan bulan	Indo-Pacific tarpon	Megalops cyprinoides	2	2	2	2	3	3	3	3	3	3	3	3	River/estuary and Mangrove fringes	Food/sale
Male	Finfish	Ikan Bulu Ayam	Gangetic anchovy	Thryssa mystax	3	3	3	3	3	3	3	3	3	3	3	3	River/estuary and Mangrove fringes	Food/sale
Male	Finfish	ikan buntal burik/hitam*	Blackspotted pufferfish	Arothron nigropunctatus	3	3	3	3	3	3	3	3	3	3	3	3	Mangrove fringes	Food (needs knowledge on preperation)
Male	Finfish	ikan buntal hijau*	Greenspotted pufferfish	Dichotomyctere nigroviridis	3	3	3	3	3	3	3	3	3	3	3	3	River/estuary	Food (needs knowledge on preperation)
Male	Finfish	ikan buntal kuning*	Golden pufferfish	Arothron meleagris	3	3	3	3	3	3	3	3	3	3	3	3	River/estuary and Mangrove fringes	Food (needs knowledge on preperation)
Male	Finfish	Ikan Cekang/Billis	Anchovy	Encrasicholina punctifer	1	1	1	2	2	3	3	3	2	2	1	1	River/estuary	Food/sale
Male	Finfish	Ikan Gegerud	Snakehead murrel	Channa striata	3	3	3	3	3	3	3	3	3	3	3	3	River/estuary and Mangrove fringes	Food/sale
Male	Finfish	Ikan Gelame	Silver white croaker	Pennahia argentata	1	1	2	2	2	3	3	3	2	2	1	1	River/estuary and Mangrove fringes	Food/sale
Male	Finfish	ikan gembung	Chub mackerels	Rastrelliger	1	1	1	1	1	1	1	1	1	3	3	3	River/estuary	Food/sale
Male	Finfish	ikan geronggong	Torpedo scad	Megalaspis cordyla	2	1	1	1	1	1	1	1	3	3	3	3	Mangrove fringes	Food/sale
Male	Finfish	ikan jahan/duri jahan	Giant catfish	Netuma thalassina	2	2	2	2	2	2	2	2	2	2	2	2	River/estuary	Food/sale
Male	Finfish	ikan julung-julung	halfbeak	Hyporhamphus unifasciatus	3	3	3	3	3	3	3	3	3	3	3	3	River/estuary and Mangrove fringes	Food/sale
Male	Finfish	ikan jumpol	Flathead grey mullet	Mugil cephalus	1	2	2	3	3	3	3	3	2	1	1	1	Mangrove fringes and Mangrove forest	Food/sale
Male	Finfish	ikan kakap hitam batu	Mangrove red snapper	Lutjanus argentimaculatus	1	1	1	1	1	1	1	1	1	1	1	1	River/estuary and Mangrove fringes	Food/sale
Male	Finfish	Ikan Kakap Putih	Black and white snapper	Macolor niger	1	2	3	3	3	3	3	3	2	2	1	1	Mangrove fringes, Nipa forest and River/estuary	Food/sale
Male	Finfish	Ikan Kasi Madu	Scalloped glassfish	Ambassis nalua	1	1	1	2	2	3	3	3	2	2	2	1	River/estuary	Food/sale
Male	Finfish	ikan kelabau		Osteochilus melanopleura	1	1	1	1	1	1	1	1	1	1	1	1	River/estuary	Food/sale
Male	Finfish	Ikan Kelempis	Barred queenfish	Chorinemus tala	1	1	1	2	2	3	3	3	2	2	1	1	River/estuary	Food/sale
Male	Finfish	ikan Kepetek	Ponyfish	Leiognathidae	2	2	2	2	2	2	2	2	2	2	2	2	River/estuary and Mangrove fringes	Food/sale
Male	Finfish	ikan kerapu	Potato grouper	Epinephelus tukula	1	1	1	1	1	1	1	1	1	1	1	1	River/estuary and Mangrove bed	Food/sale
Male	Finfish	ikan kertang/kerapu kuning	Yellow grouper	Epinephelus awoara	1	1	1	1	1	1	1	1	1	1	1	1	River/estuary	Food/sale
Male	Finfish	Ikan Ketang	Spotted scar/butterfish	Scatophagus argus	1	1	2	2	3	3	3	3	2	2	1	1	River/estuary and Mangrove fringes	Food/sale
Male	Finfish	ikan kirang-kirang	Common hairfin anchovy	Setipinna tenuifilis	2	2	2	2	2	2	2	2	2	2	2	2	Mangrove fringes	Food
Male	Finfish	Ikan Kurau	Indian threadfin	Eleutheronema tetradactylum	1	1	1	1	1	1	1	1	1	1	1	1	River/estuary and Mangrove fringes	Food/sale
Male	Finfish	ikan lepuk api*	red lionfish	Pterois volitans	2	2	2	2	2	2	2	2	2	2	2	2	Mangrove fringes, Mangrove bed and River/estuary	Food (needs knowledge on preperation)
Male	Finfish	ikan Lundu	two spot catfish	Mystus nigriceps	2	2	2	2	2	2	2	2	2	2	2	2	Mangrove fringes, Nipa forest, Mangrove roots and River/estuary	Food/sale
Male	Finfish	ikan lundu/baung		Mystus bimaculatus	2	2	2	2	2	2	2	2	2	2	2	2	Mangrove fringes	Food/sale
Male	Finfish	Ikan Malong	Daggertooth pike conger	Muraenesox cinereus	1	1	2	2	2	3	3	3	2	2	1	1	River/estuary and Mangrove fringes	Food/Sale and Fish bait
Male	Finfish	Ikan Patin	Iridescent shark/catfish	Pangasianodon hypophthalmus	2	1	1	1	1	1	1	1	1	1	2	2	River/estuary and Mangrove fringes	Food/sale
Male	Finfish	Ikan Pirang-pirang	Scaly hairfin anchovy	Setipinna taty	3	3	3	3	3	3	3	3	3	3	3	3	River/estuary and Mangrove fringes	Food/sale
Male	Finfish	ikan ringau	Indonesian tiger perch	Datnioides microlepis	1	1	1	1	1	1	1	1	1	1	1	1	Mangrove fringes	Sale
Male	Finfish	Ikan Ronjing	large yellow crocea	Larimichthys crocea	2	2	2	2	2	2	2	2	2	2	2	2	River/estuary and Mangrove fringes	Food/sale
Male	Finfish	ikan sapi-sapi/tilan	Fire eel	Mastacembelus erythrotaenia	2	2	2	2	2	2	2	2	2	2	2	2	Mangrove bed	Sale
Male	Finfish	Ikan Selangat	Chacunda gizzard shad	Anodontostoma chacunda	1	3	3	3	3	3	3	3	2	2	1	1	Mangrove fringes	Food/sale
Male	Finfish	ikan selayur	haritail fish	Trichiurus lepturus	2	2	2	2	2	2	2	2	2	2	2	2	River/estuary and Mangrove fringes	Food/sale
Male	Finfish	Ikan Seluang	Seluang fish	Rasbora	2	2	2	2	2	2	2	2	2	2	2	2	Mangrove fringes	Food/sale
Male	Finfish	Ikan Sembekah	Zig-zag eel	Mastacembelus armatus	2	2	2	2	2	2	2	2	2	2	2	2	Mangrove roots, River/estuary and Mangrove fringes	Food/sale
Male	Finfish	Ikan sembelang	eeltail catfish	Plotosidae	2	2	2	2	2	3	3	3	2	2	2	2	River/estuary and Mangrove fringes	Food/sale
Male	Finfish	ikan semengkah	Petrale sole	Eopsetta jordani	2	2	2	2	2	2	2	2	2	2	2	2	Mangrove fringes and Nipa forest, River estuary	Food/sale
Male	Finfish	Ikan Semerah	Red snapper	Lutjanus bitaeniatus	2	2	2	2	2	3	3	3	2	2	2	1	River/estuary and Mangrove fringes	Food/sale
Male	Finfish	ikan seminyak	Jewfish	Argyrosomus japonicus	1	1	3	3	3	3	3	3	3	3	2	2	Mangrove forest, bed and River estuary	Food/sale
Male	Finfish	ikan senangin	Fourfinger threadfin	Eleutheronema tetradactylum	1	1	1	1	1	1	1	1	1	1	1	1	River/estuary	Food/sale
Male	Finfish	ikan senjolong	Halfbeak	Hemiramphus far	3	3	3	3	3	3	3	3	3	3	3	3	River/estuary	Food/sale
Male	Finfish	ikan senyumpit	Smallscale Archerfish	Toxotes microlepis	1	3	3	3	3	3	3	3	1	1	1	1	River/estuary	Food/sale
Male	Finfish	Ikan Seriding	Scalloped glassfish	Ambassis nalua	3	3	3	3	3	3	3	3	3	3	3	3	Mangrove roots, Mangrove fringes and River/estuary	Food/sale
Male	Finfish	ikan Sumpit/Sesumpit	Archerfish	Toxotes	3	3	3	3	3	3	3	3	2	1	1	1	Mangrove roots, Nipa forest and River/estuary	Food/sale
Male	Finfish	Ikan Talang	Doublespotted queenfish	Scomberoides lysan	3	1	1	1	1	2	2	2	2	3	3	3	River/estuary and Mangrove fringes	Food/sale
Male	Finfish	ikan tapah	Freshwater catfish	Wallago attu	1	1	1	1	1	1	1	1	1	1	1	1	River/estuary	Food/sale
Male	Finfish	Ikan Tenggiri	Spanish mackerel	Scomberomorus commerson	2	2	2	2	2	2	2	2	2	2	2	2	River/estuary and Mangrove fringes	Food/sale
Male	Finfish	ikan tiang layar	Indo-Pacific Sailfish	Istiophorus platypterus	1	1	1	1	1	1	1	1	1	1	1	1	Mangrove fringes	Food/sale
Male	Finfish	Ikan Todak	Swordfish	Xiphias gladius	3	3	3	3	3	3	3	3	3	3	3	3	Mangrove roots, Mangrove fringes and River/estuary	Food/sale
Male	Finfish	Ikan Toman	Giant snakehead	Channa micropeltes	2	2	2	2	2	2	2	2	2	2	2	2	River/estuary and Mangrove fringes	Food/sale
Male	Finfish	Ikan Tudung Tempayan	Teira batfish	Platax teira	1	1	2	2	2	3	3	3	2	1	1	1	River/estuary and Mangrove fringes	Food/sale
